# Supplementary material for: Facile and eco-friendly synthesis of green fluorescent carbon nanodots for applications in bioimaging, patterning and staining
Source: Royal Society of Chemistry journal article supplement (doi:10.1039/c5nr00783f), 2015-01-01
Supplement: c5nr00783f1.pdf [file c5nr00783f1.pdf]

## Supplementary Information

Facile and eco-friendly synthesis of green fluorescent carbon nanodots for bioimaging,  
patterning and staining

Lihong Shi<sup>a,\*</sup>, Yanyan Li<sup>a</sup>, Xiaofeng Li<sup>b</sup>, Xiangping Wen<sup>a</sup>, Guomei Zhang<sup>a</sup>, Jun  
Yang<sup>a</sup>, Chuan Dong<sup>a</sup>, Shaomin Shuang<sup>a</sup>

<sup>a</sup>College of Chemistry and Chemical Engineering, Institute of Environmental Science,  
Shanxi University, Taiyuan 030006, PR China

<sup>b</sup>Taiyuan University, Taiyuan 030012, PR China

\* Corresponding author: Fax: +86-531-7018842; Tel: +86-531-7011688;

E-mail addresses: [shilihong@sxu.edu.cn](mailto:shilihong@sxu.edu.cn) (Lihong Shi).

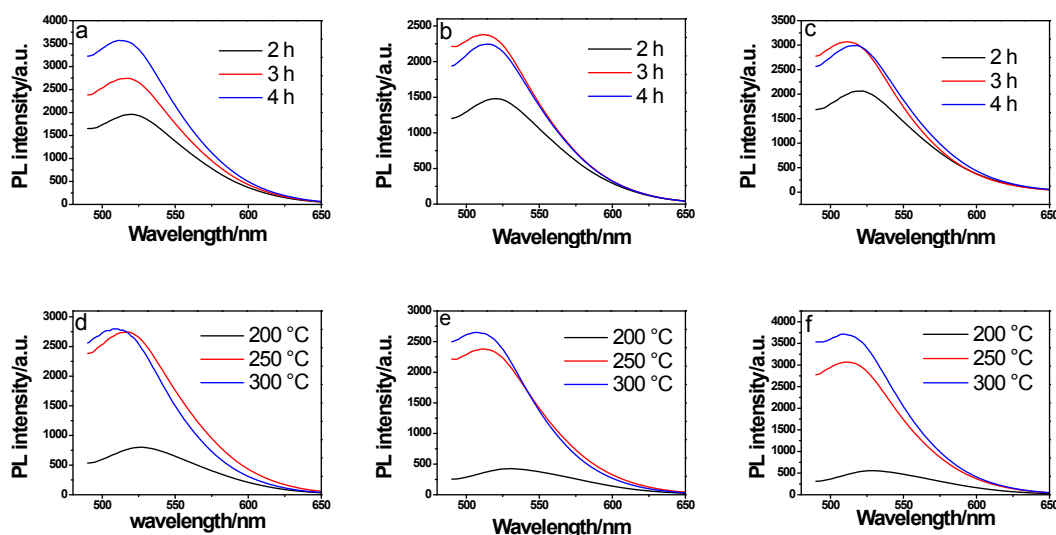

Fig. S1 Fluorescence spectra of (a) CD<sub>Ara</sub>, (b) CD<sub>Hol</sub>, and (c) CD<sub>Mor</sub> under different time and (d) CD<sub>Ara</sub>, (e) CD<sub>Hol</sub>, and (f) CD<sub>Mor</sub> under different temperature.

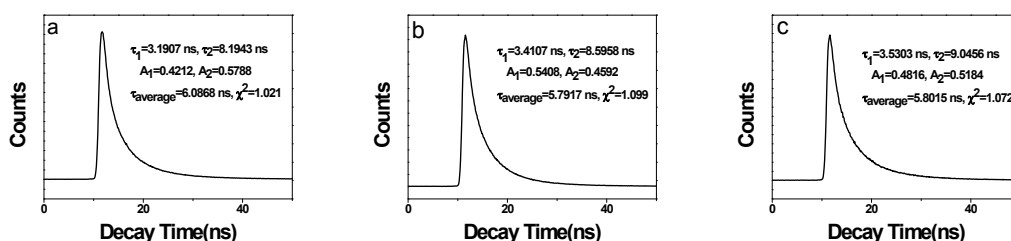

Fig. S2 Fluorescence decay of (a) CD<sub>Ara</sub>, (b) CD<sub>Hol</sub>, and (c) CD<sub>Mor</sub>.

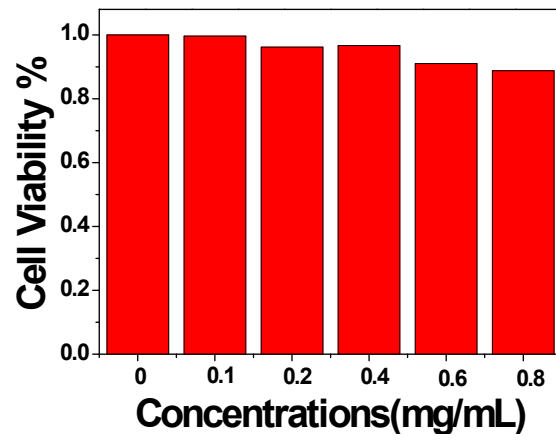

Fig. S3 Cytotoxic effects of CD<sub>Ara</sub> on A193 cells.
